# Supplementary material for: “Resistance Is Futile”: A Pilot Study into Pseudoresistance in Canine Epilepsy
Source: MDPI journal article supplement (doi:10.3390/ani13193125), 2023-10-06
Supplement: s1 [file s1]

Supplementary Materials:

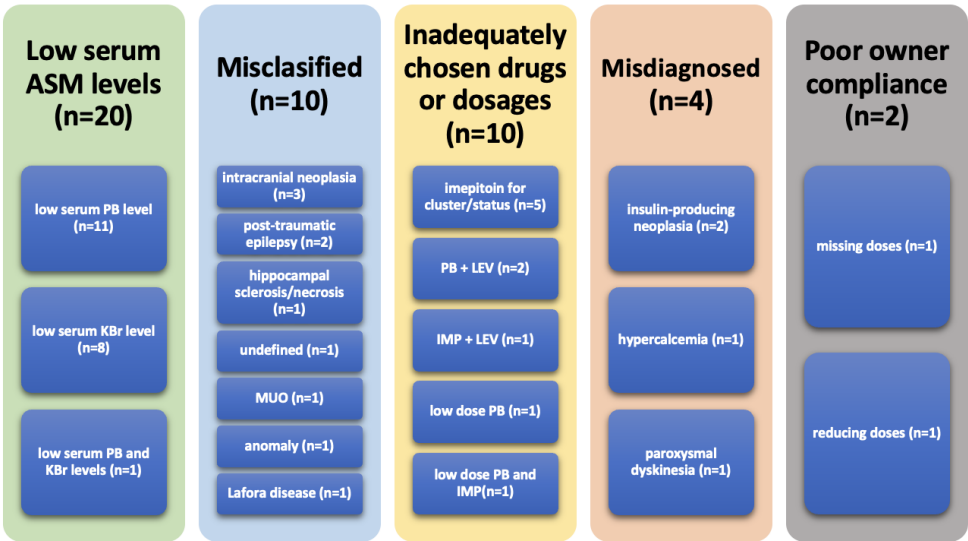

**Figure S1.** Distribution of patients within subcategories of different main pseudoresistance categories. (the figure does not show combinations of groups). Abbreviations: ASM = anti-seizure medication. PB = phenobarbital. KBr = potassium bromide. LEV = levetiracetam. IMP = imepitoin. MUO = meningoencephalitis of unknown origin.

**Table S1.** Response to changes in therapeutic protocols in different categories of patients with pseudoresistance. Abbreviations: ASM = anti-seizure medication.

| CATEGORIES                           | RESPONSE |      |
|--------------------------------------|----------|------|
| Low ASM                              | Yes      | n=15 |
|                                      | No       | n=0  |
| Misclassified                        | Yes      | n=5  |
|                                      | No       | n=1  |
| Inadequately chosen drugs or dosages | Yes      | n=6  |
|                                      | No       | n=0  |
| Misdiagnosed                         | Yes      | n=4  |
|                                      | No       | n=0  |
| Poor owner compliance                | Yes      | n=2  |
|                                      | No       | n=0  |
